# Supplementary material for: Fluorescence signal amplification of gold nanoclusters with silver ions
Source: Royal Society of Chemistry journal article supplement (doi:10.1039/c8ay01955j), 2018-01-01
Supplement: c8ay01955j1.pdf [file c8ay01955j1.pdf]

## Supporting Information

### Fluorescence Signal Amplification of Gold Nanocluster with Silver Ions

Wan Jiang, Bo Rao, Qinzhen Li, Jinsong Chai, Sha Yang, Yuanxin Du, Haizhu Yu\* and Manzhou Zhu\*

<sup>a</sup>Department of Chemistry and Center for Atomic Engineering of Advanced Materials, Anhui Province Key Laboratory of Chemistry for Inorganic/Organic Hybrid Functionalized Materials, Anhui University, Hefei, Anhui Province 230601, P. R. China

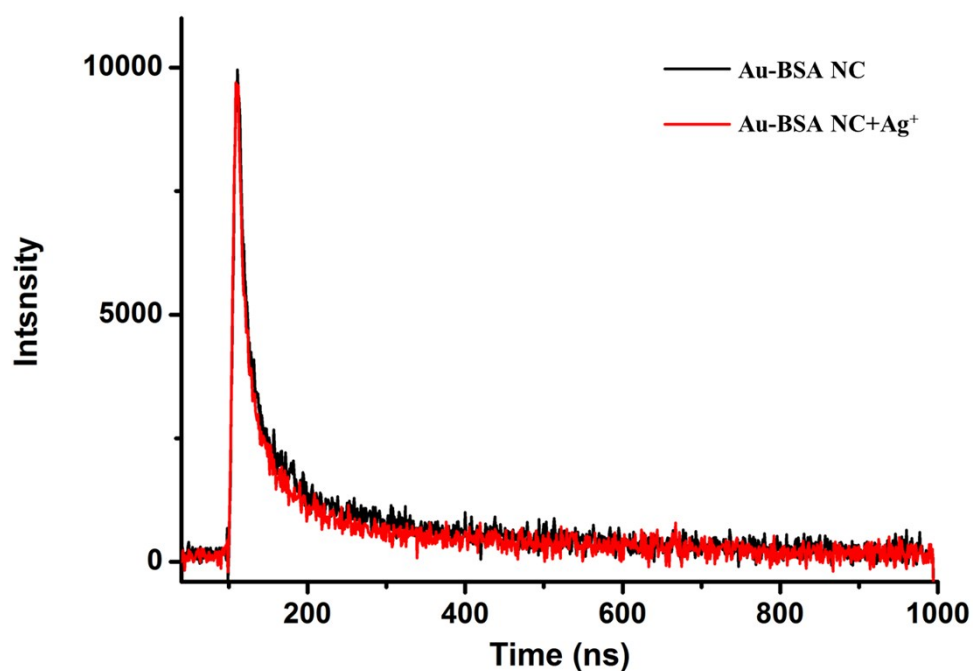

**Figure S1.** Time-resolved emission-decay curves of Au NC (black line) before and after adding Ag<sup>+</sup> (red line).

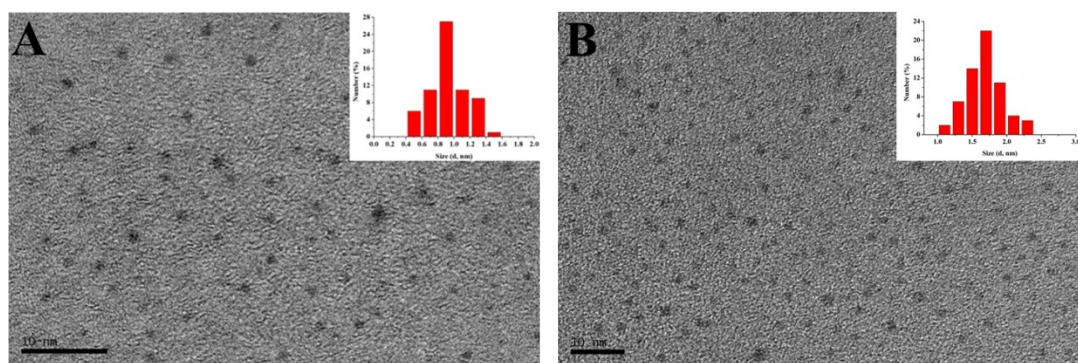

**Figure S2.** TEM images of (A) Au-BSA NCs and (B) Au-BSA NC+Ag<sup>+</sup>. The inset shows the size distribution histogram.

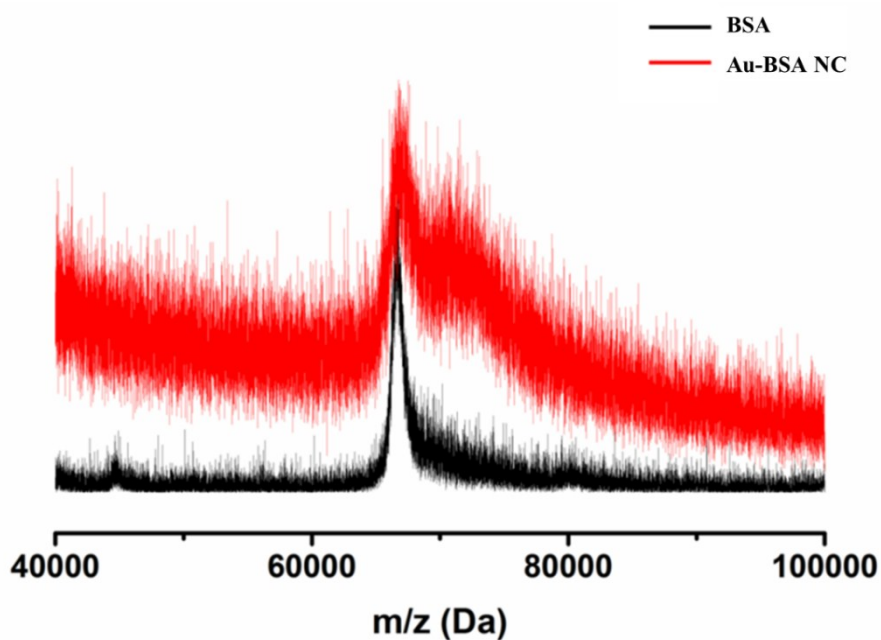

**Figure S3.** The MALDI-MS spectra of BSA molecule (black line) and Au-BSA NC (red line).

**Table S1.** Fluorescence decay parameters of Au NC before and after adding Ag<sup>+</sup>.

|                                 | $\tau_1$ | $A_1$ | $\tau_2$ | $A_2$ | $\tau_3$ | $A_3$ | $\langle\tau\rangle$ [ns] |
|---------------------------------|----------|-------|----------|-------|----------|-------|---------------------------|
| <b>Au-BSA NC</b>                | 2.99     | 0.23  | 0.48     | 0.70  | 42.3     | 0.08  | 4.29                      |
| <b>Au-BSA NC+Ag<sup>+</sup></b> | 3.80     | 0.23  | 0.59     | 0.71  | 57.6     | 0.06  | 4.58                      |

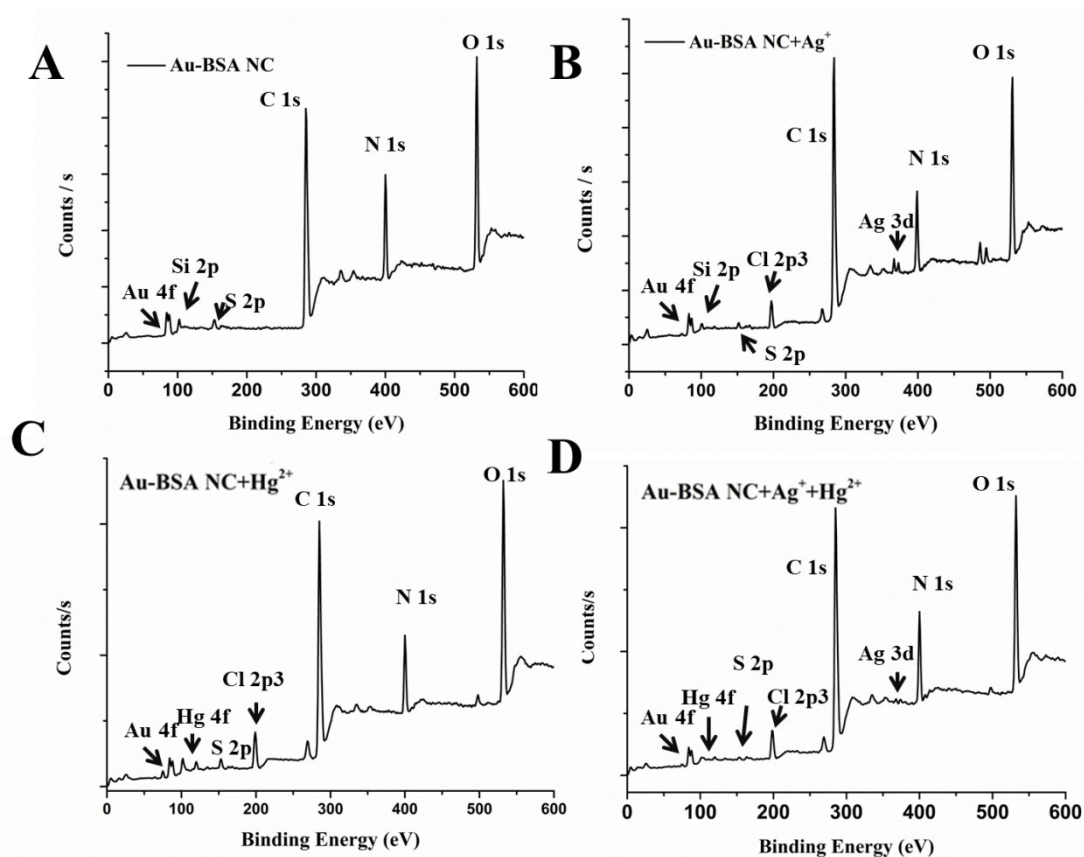

**Figure S4.** The main elements for the Au-BSA NC (A), Au-BSA NC+ $\text{Ag}^+$  (B), Au-BSA NC+ $\text{Hg}^{2+}$  (C) and Au-BSA NC+ $\text{Ag}^+$ + $\text{Hg}^{2+}$  (D) after adding  $\text{Hg}^{2+}$  ions.

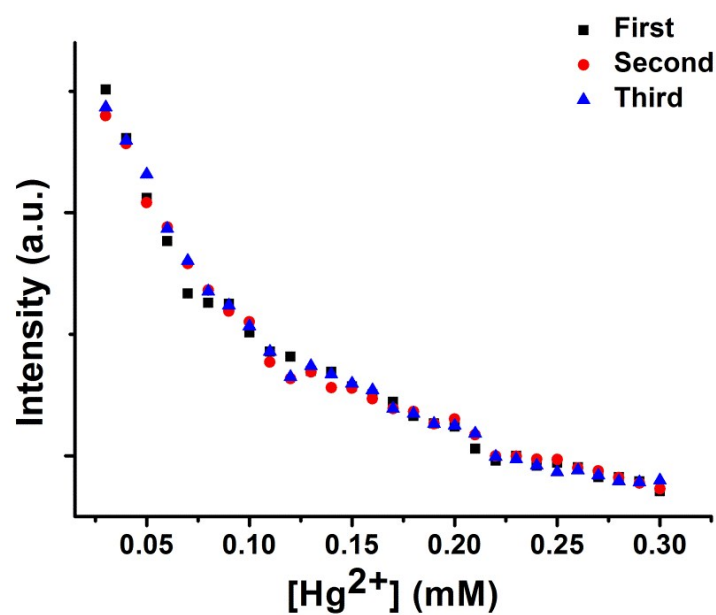

**Figure S5.** Three group parallel experiments of the luminescence amplification of  $\text{Ag}^+$  on the solution system containing Au-BSA NC and  $\text{Hg}^{2+}$ .
